# Supplementary material for: Effect of multi-strain bifidobacteria supplementation on intestinal microbiota development in low birth weight neonates: a randomized controlled trial
Source: PubMed Central journal article supplement — Biosci Microbiota Food Health. 2024 Jun 17;43(4):352–8. doi: 10.12938/bmfh.2023-093 (PMC11444860; doi:10.12938/bmfh.2023-093), 2024-06-17
Supplement: bmfh-43-352-s001.pdf [file bmfh-43-352-s001.pdf]

### Supplemental material 1. PCR primers for detection of infant's intestinal bacteria.

| Target                                                 | Primer     | Sequence (5' to 3')    |
|--------------------------------------------------------|------------|------------------------|
| Total bacteria                                         | Probio_Uni | CCTACGGGRSGCAGCAG      |
|                                                        | Probio_Rev | ATTACCGCGGCTGCT        |
| <i>Bifidobacterium bifidum</i>                         | BiBIF-1    | CCACATGATCGCATGTGATTG  |
|                                                        | BiBIF-2    | CCGAAGGCTTGCTCCCAA     |
| <i>Bifidobacterium breve</i>                           | BiBRE-1    | CCGGATGCTCCATCACAC     |
|                                                        | BiBRE-2    | ACAAAGTGCCTTGCTCCCT    |
| <i>Bifidobacterium longum</i> . subsp. <i>longum</i>   | BiLON-1    | TTCCAGTTGATCGCATGGTC   |
|                                                        | BiLON-2    | GGGAAGCCGTATCTCTACGA   |
| <i>Bifidobacterium longum</i> . subsp. <i>infantis</i> | Sia-266F   | GACGAGGAGGAATACAGCAG   |
|                                                        | Sia-676R   | CACGAACAGCGAATCATGGATT |

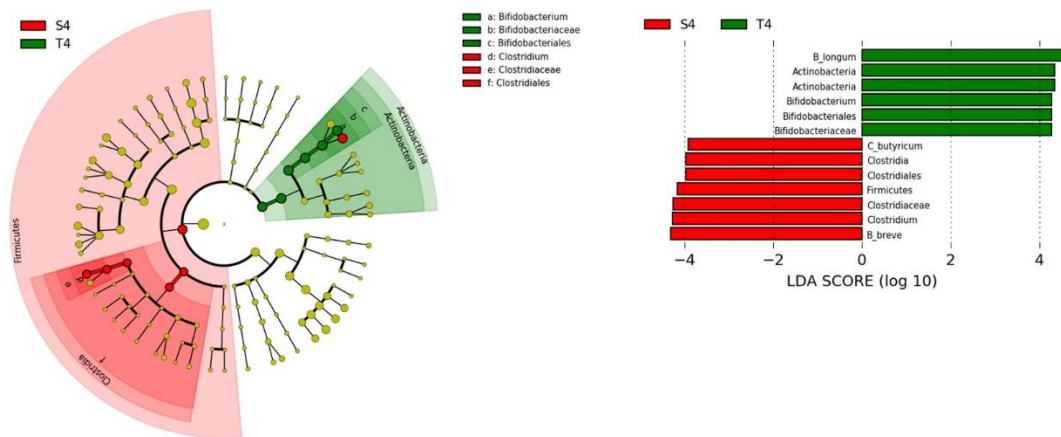

**Supplemental material 2. Linear discriminant analysis effect size (LEfSe) in weeks 4 feces samples between study groups described by a cladogram and linear discriminant analysis score graph. S4 (red), single-strain group at weeks 4; T4 (green), triple-strain group at weeks 4.**
